# Supplementary material for: The tyrosine transporter of Toxoplasma gondii is a member of the newly defined apicomplexan amino acid transporter (ApiAT) family
Source: PubMed Central journal article supplement (PMC6386423; doi:10.1371/journal.ppat.1007577), 2019-02-11
Supplement: ppat.1007577.s001.pdf [file ppat.1007577.s001.pdf]

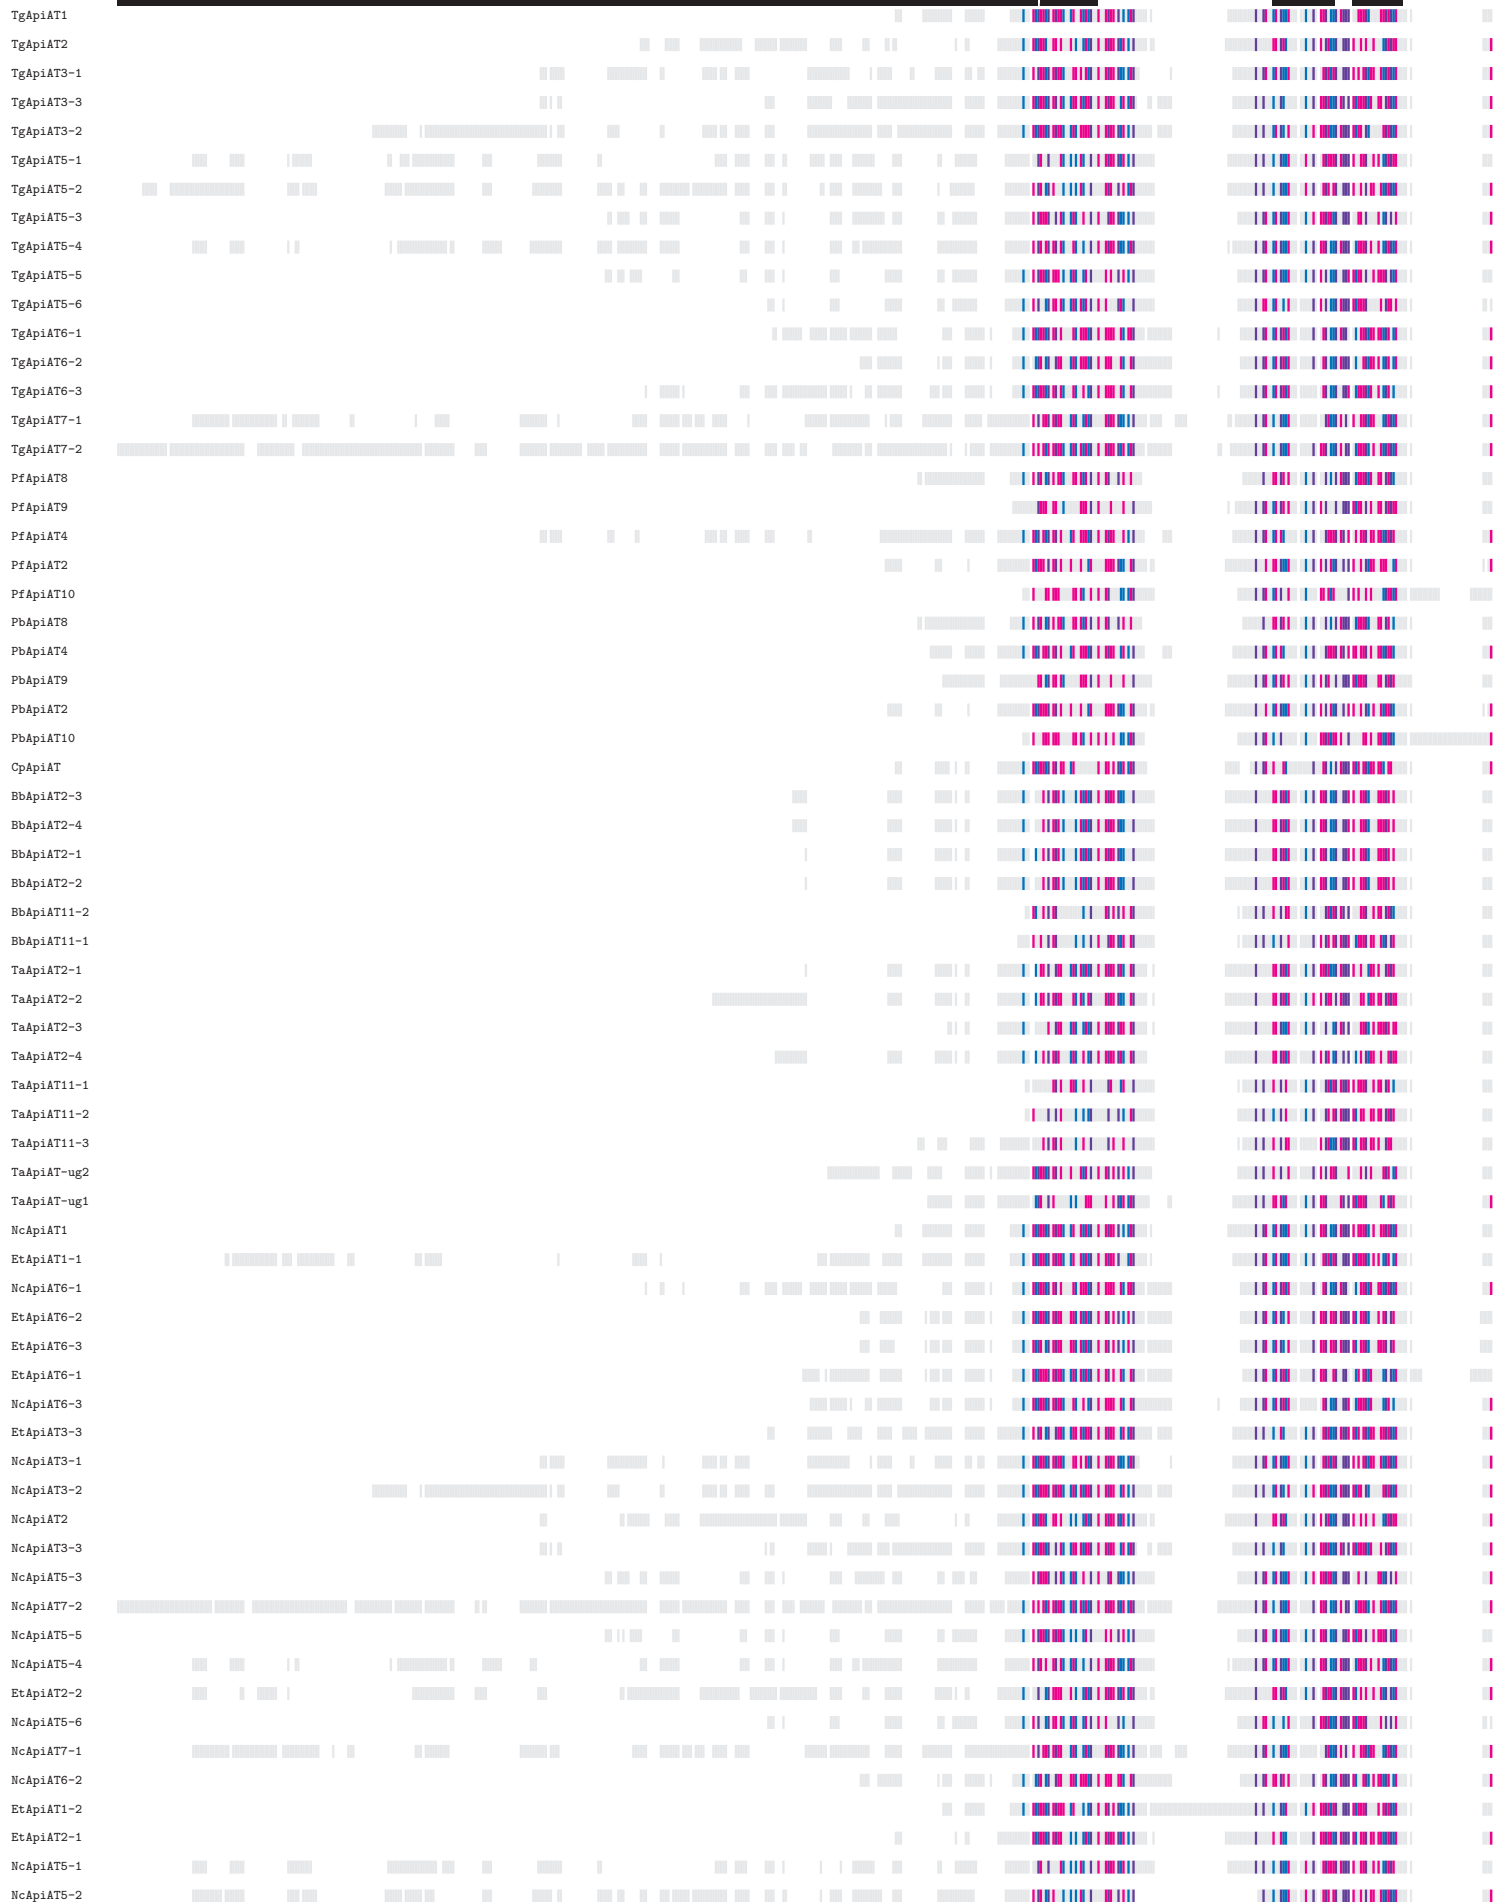

4

5

6

Large intracellular loop

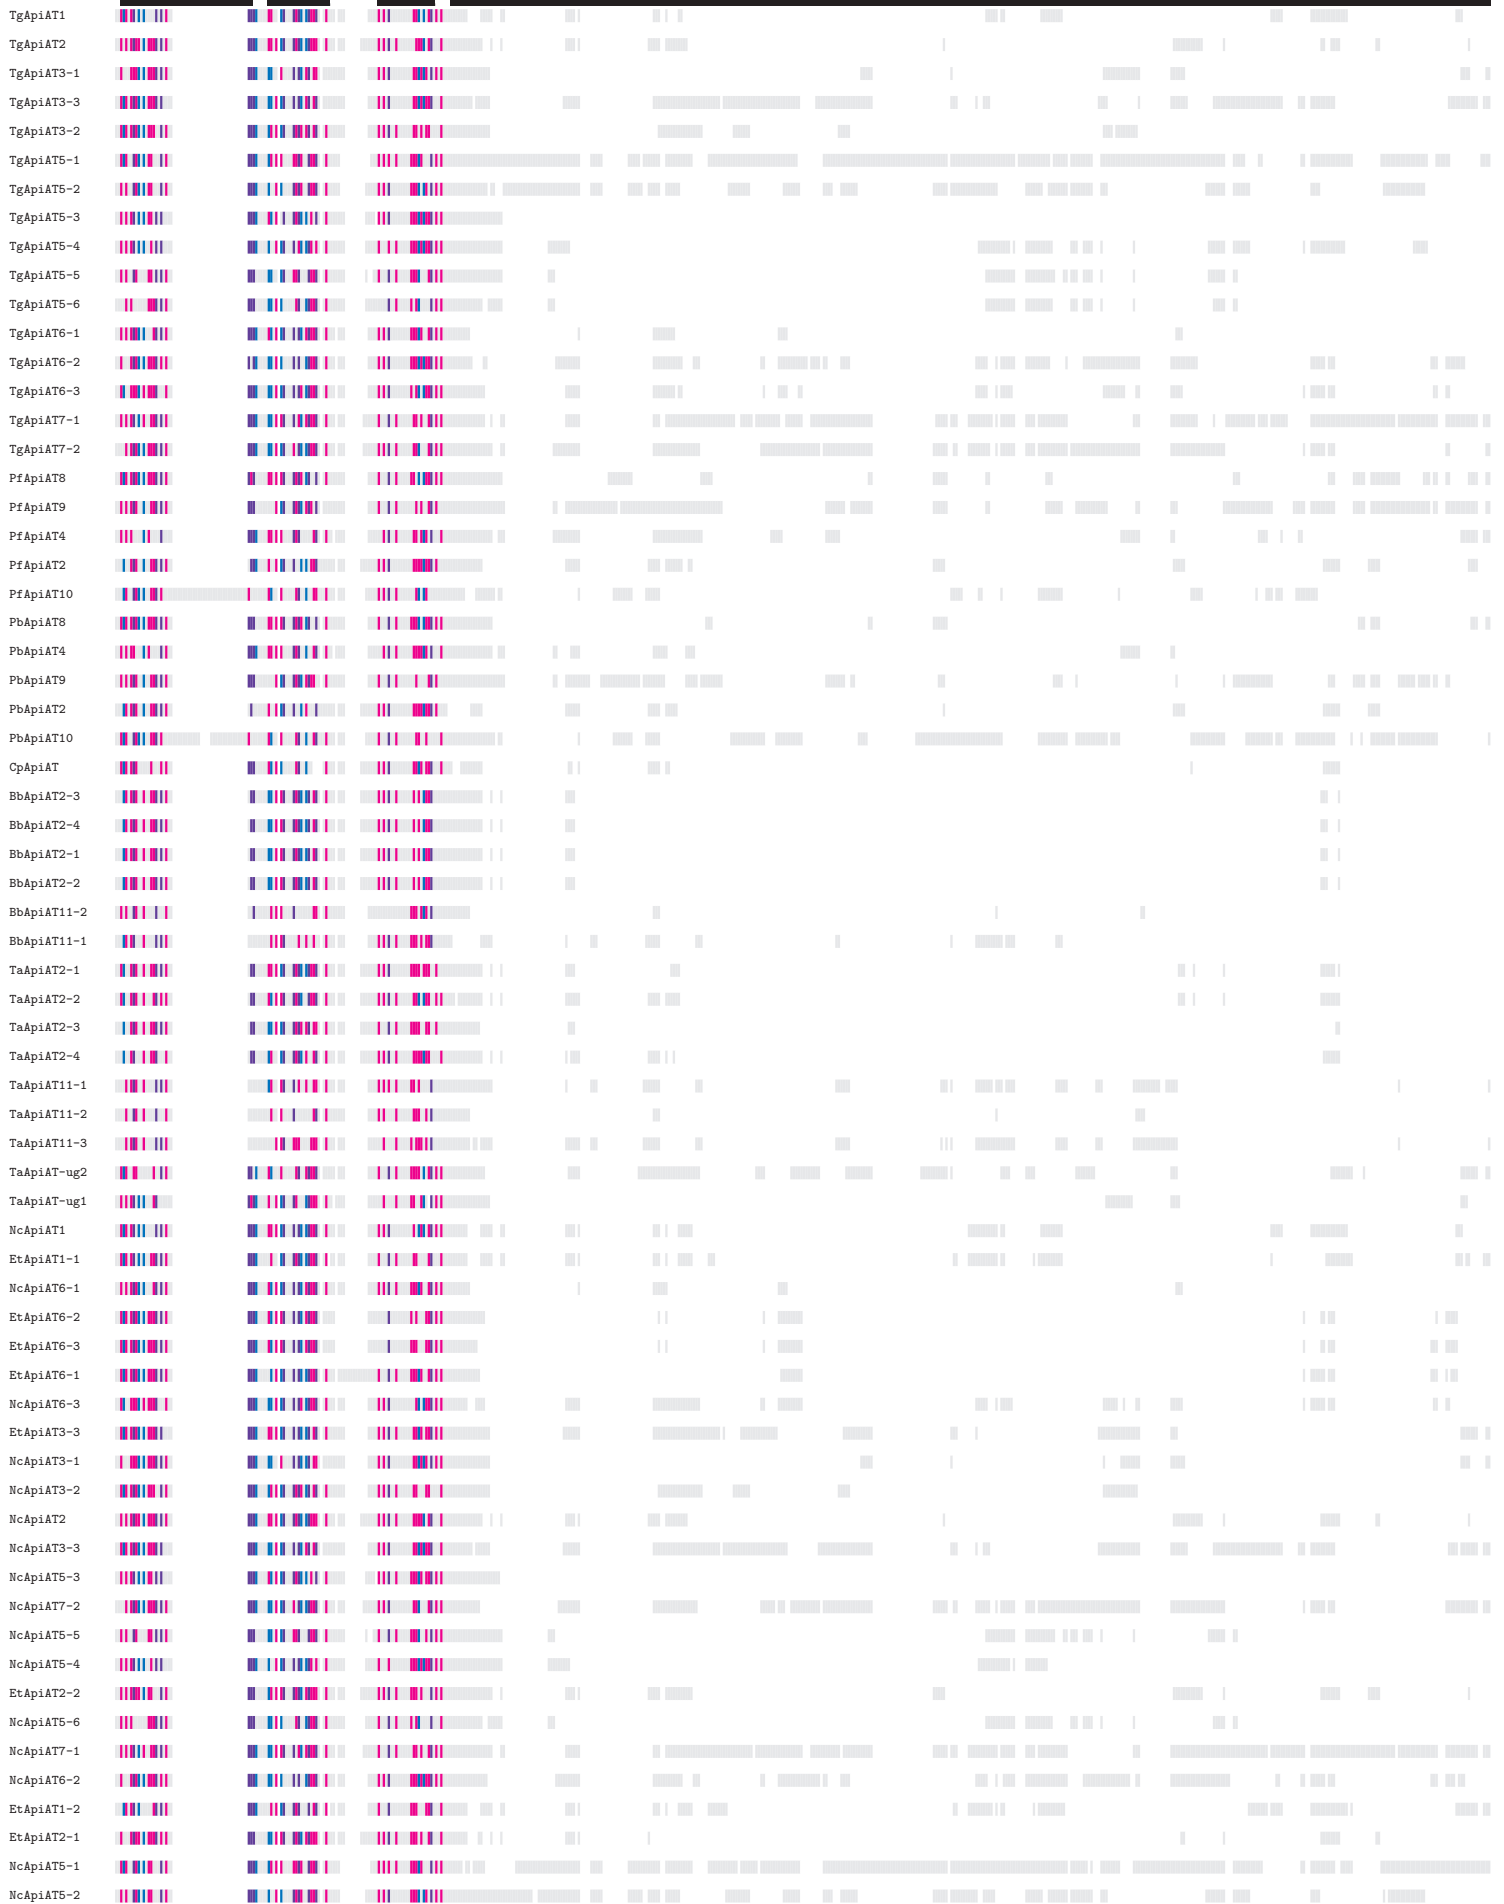

*Large intracellular loop*

7      8    9    10    11    12

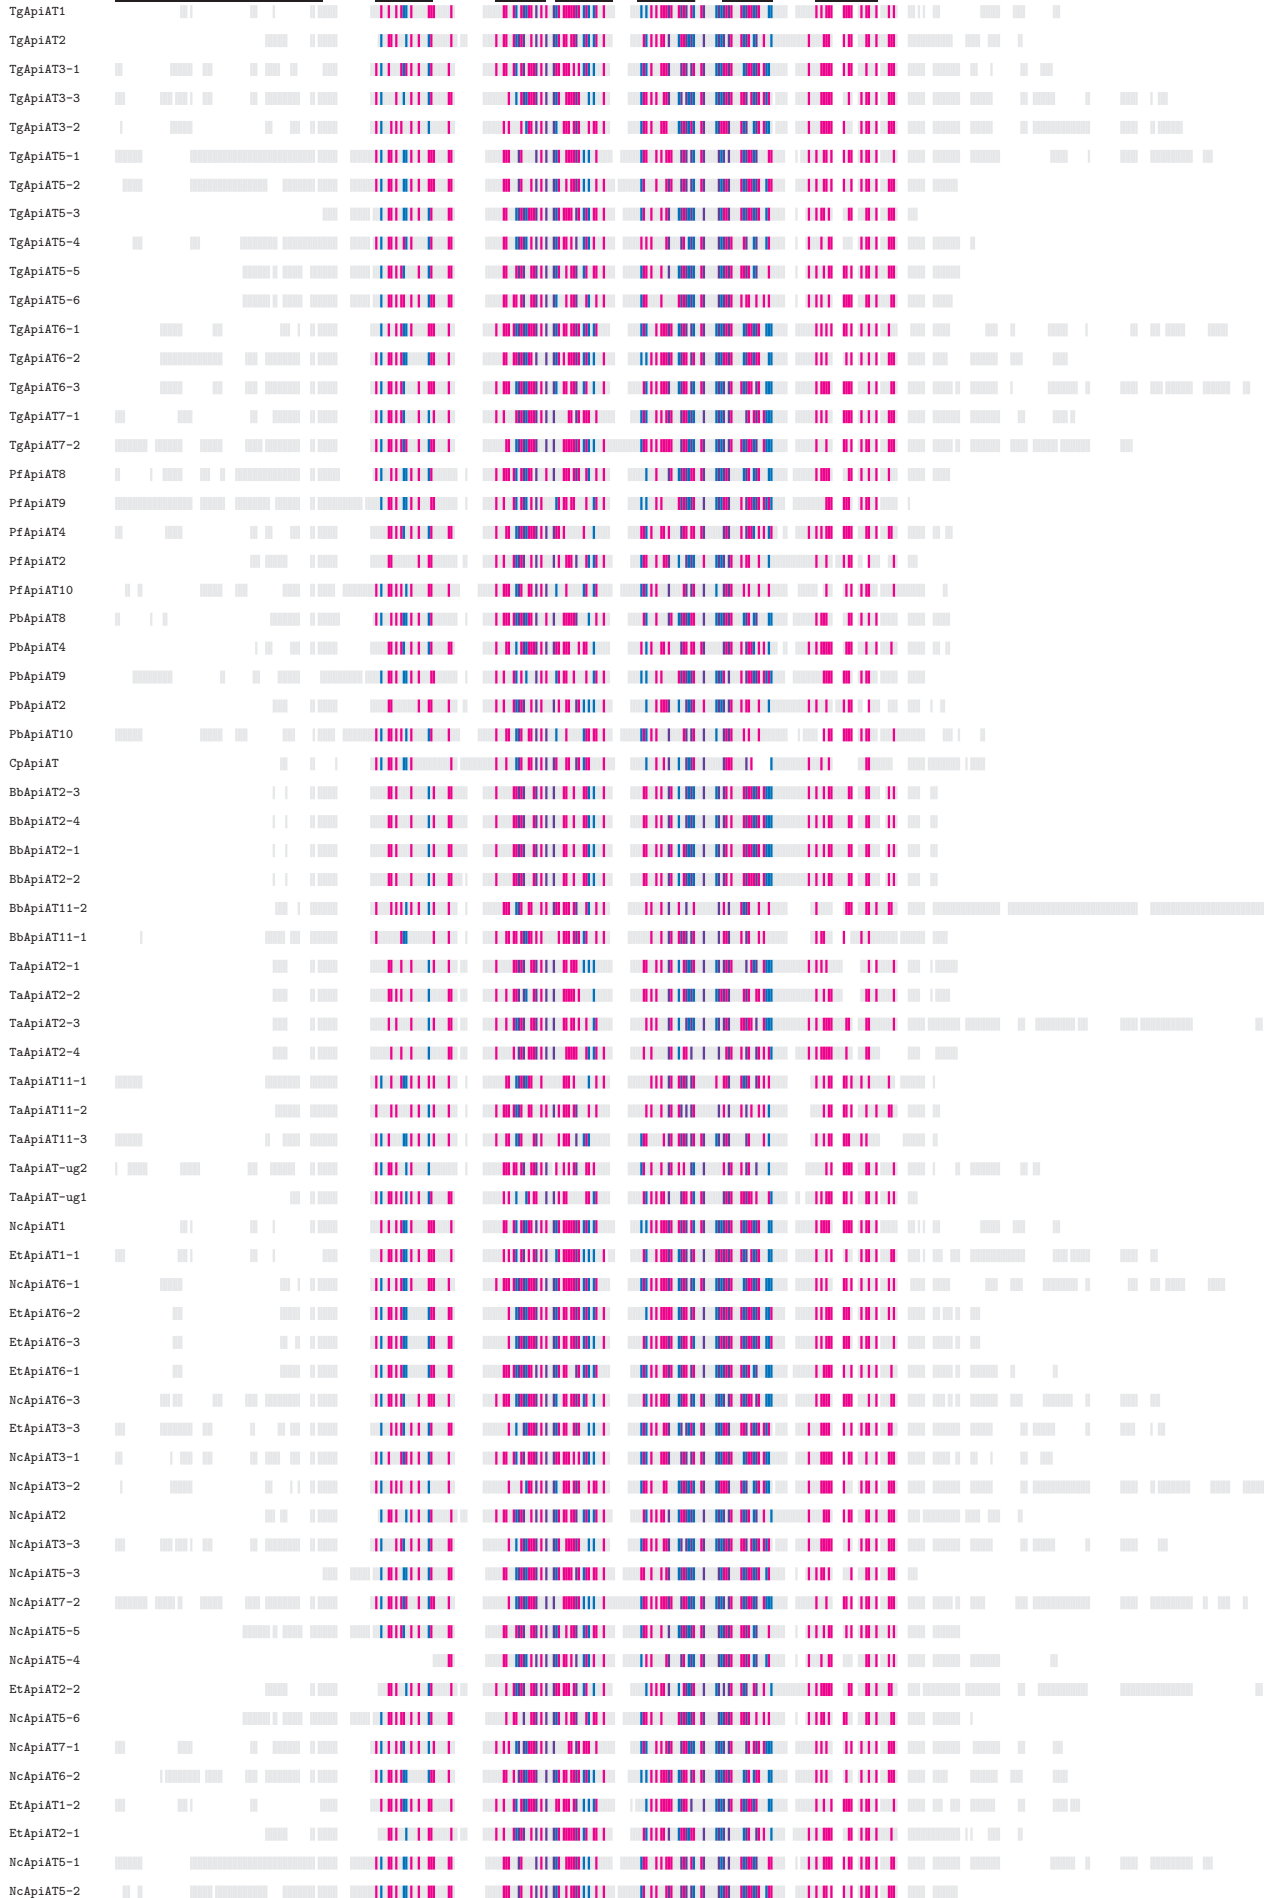

| non conserved  
 | similar  
 |  $\geq 50\%$  conserved  
 |  $\geq 70\%$  conserved
